# Supplementary material for: CCL5 Deficiency Enhanced Cryo–Thermal-Triggered Long-Term Anti-Tumor Immunity in 4T1 Murine Breast Cancer
Source: MDPI journal article supplement (doi:10.3390/biomedicines10030559), 2022-02-26
Supplement: s1 [file s1]

## Supplementary Materials

# CCL5 deficiency enhanced cryo-thermal-triggered long-term anti-tumor immunity in 4T1 murine breast cancer

Yue Lou <sup>1</sup>, Shengguo Jia <sup>1</sup>, Ping Liu <sup>1,\*</sup> and Lisa X. Xu <sup>1,\*</sup>

<sup>1</sup> School of Biomedical Engineering and Med-X Research Institute, Shanghai Jiao Tong University, Shanghai, China

\* Correspondence: LXX: [lisaxu@sjtu.edu.cn](mailto:lisaxu@sjtu.edu.cn); PL: [pingliu@sjtu.edu.cn](mailto:pingliu@sjtu.edu.cn)

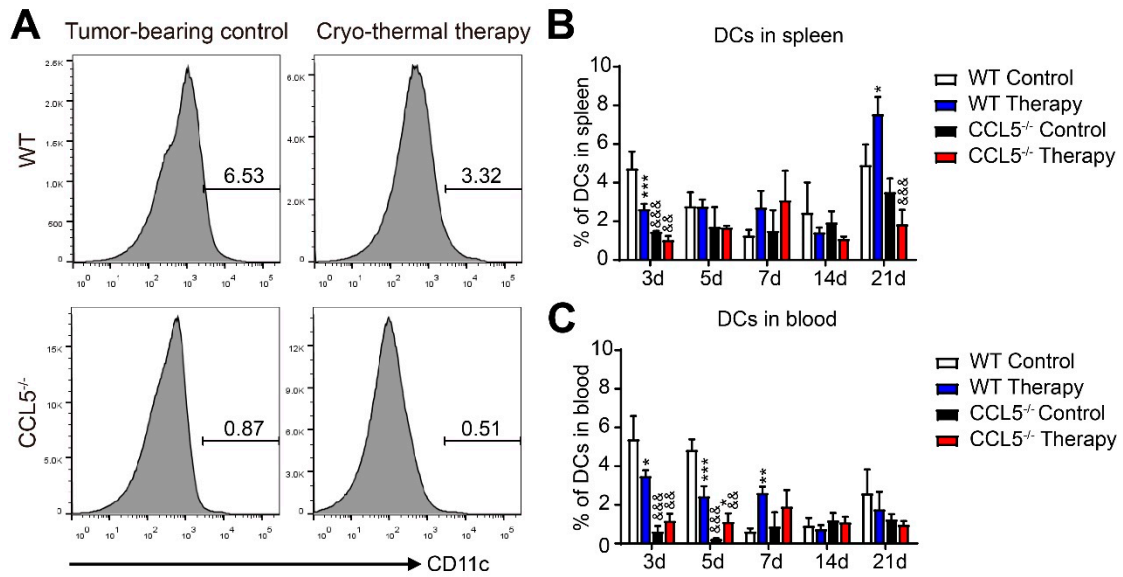

**Supplementary Figure S1 CCL5 KO was up-regulated the proportion of DCs at early stage after therapy.** (A) Flow cytometry gating strategy for determination of CD11c<sup>+</sup>DCs in spleen and the peripheral blood. Flow-cytometry analysis of the dynamic change of DC proportion in spleen (B) and the peripheral blood (C) was performed at different time points (3d, 5d, 7d, 21d after cryo-thermal therapy) as compared to the tumor-bearing control group. n = 4 mice at each time point per group. Data was shown as mean  $\pm$  SD. \*p < 0.05; \*\*p < 0.01; \*\*\*p < 0.001 was considered to be statistically significant as compared to WT tumor-bearing control. &p < 0.05; &&p < 0.01; &&&p < 0.001 was considered to be statistically significant as compared to cryo-thermal treated WT or cryo-thermal treated CCL5<sup>-/-</sup> mice.

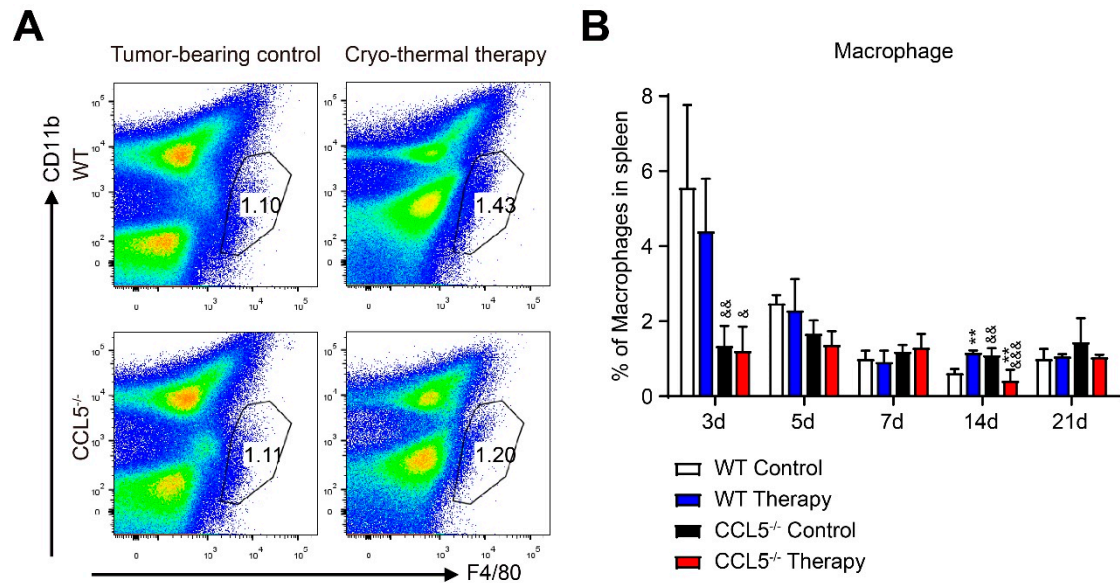

**Supplementary Figure S2 CCL5 KO down-regulated the proportion of macrophages in spleen on day 24 after tumor inoculation in tumor-bearing CCL5 deficiency mice.** (A) Flow cytometry gating strategy for determination of the CD11b<sup>+</sup>F4/80<sup>+</sup> macrophage proportion in spleen. (B) Flow-cytometry analysis of the percentages of macrophages in spleen was performed at different time points (3d, 5d, 7d, 14d, 21d after cryo-thermal therapy) as compared to the tumor-bearing control group. n=4 mice at each time point per group. Data was shown as mean ± SD. \*p < 0.05; \*\*p < 0.01; \*\*\*p < 0.001 was considered to be statistically significant compared to WT tumor-bearing control. &p < 0.05; &&p < 0.01; &&&p < 0.001 was considered to be statistically significant compared to WT cryo-thermal treated or CCL5<sup>-/-</sup> cryo-thermal treated group.

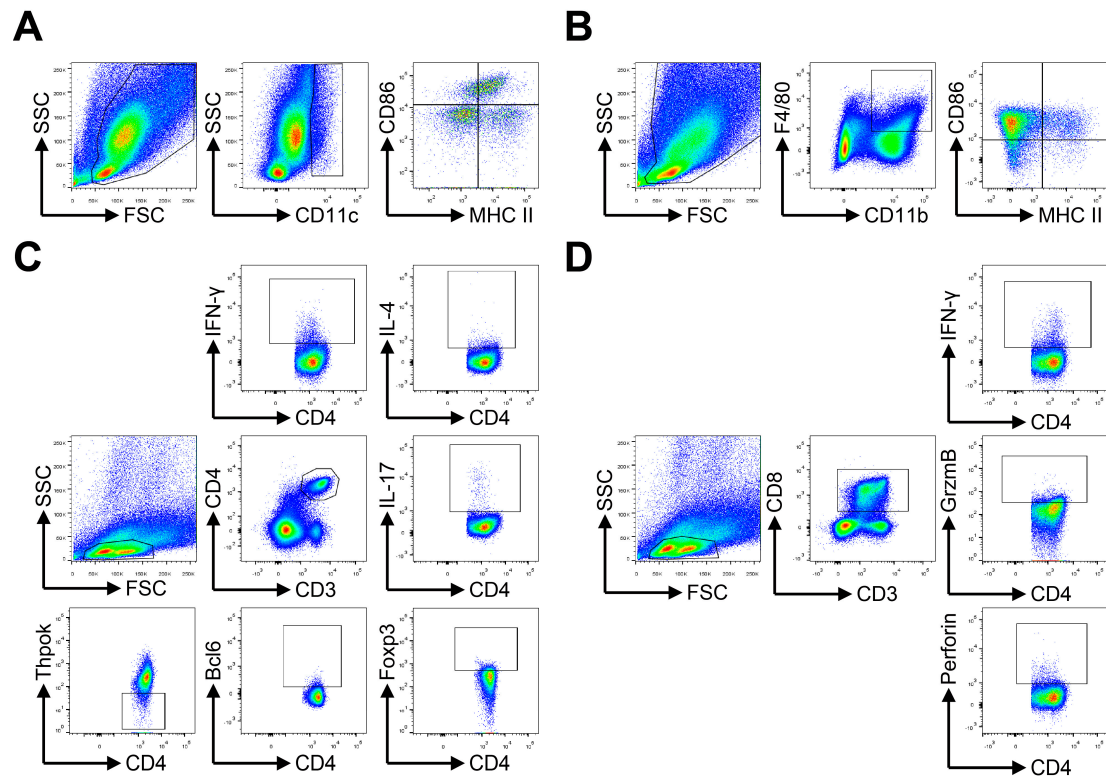

**Supplementary Figure S3 Gating strategy for immune cell subpopulations.** Flow cytometric gating strategy to identify DCs (A), macrophages (B), CD4 subsets (C) and CD8 subsets (D) through surface marker, cytokine and transcriptional factor expression.
